# Supplementary material
Source: PubMed Central journal article supplement (PMC2910368)
Supplement: NIHMS221516-supplement-Supp1.pdf [file NIHMS221516-supplement-Supp1.pdf]

## SUPPLEMENTAL MATERIAL

### Supplemental Tables

**S-Table 1. Antibodies used for the immunohistochemical staining**

| Antibodies | Working dilution | Species | Manufacturers                                          |
|------------|------------------|---------|--------------------------------------------------------|
| Human CRP  | x 2,000          | Mouse   | Sigma-Aldrich Japan, Tokyo, Japan                      |
| Rabbit CRP | x 100            | Chicken | Immunology Consultants Laboratory<br>Inc., Newberg, OR |
| RAM11      | x 400            | Mouse   | Dako Japan Inc., Tokyo, Japan                          |
| HHF35      | x 300            | Mouse   | Enzo Biochemicals, NY                                  |

**S-Table 2. Blood and biochemical analysis of cholesterol-fed Tg and non-Tg rabbits**

| Variables examined         | non-Tg (n=13) | hCRP-Tg-1 (n=13) | hCRP-Tg-2 (n=5) |
|----------------------------|---------------|------------------|-----------------|
| WBC ( $10^2/\mu\text{L}$ ) | 113 ± 11      | 102 ± 5          | 95 ± 18         |
| RBC ( $10^4/\mu\text{L}$ ) | 447 ± 44      | 471 ± 34         | 587 ± 13        |
| HGB (g/dL)                 | 9.6 ± 0.9     | 10.0 ± 0.7       | 12.3 ± 0.3      |
| HCT (%)                    | 31.1 ± 2.1    | 32.1 ± 1.7       | 36.8 ± 1.3      |
| PLT ( $10^3/\mu\text{L}$ ) | 225 ± 25      | 193 ± 20         | 281 ± 27        |
| NEUT (%)                   | 36.7 ± 3.9    | 37.3 ± 2.7       | 32.3 ± 1.5      |
| LYMPH (%)                  | 56.0 ± 3.9    | 55.6 ± 2.9       | 62.0 ± 2.2      |
| MONO (%)                   | 3.2 ± 0.3     | 3.0 ± 0.5        | 2.3 ± 0.3       |
| EO (%)                     | 0.0 ± 0.0     | 0.0 ± 0.0        | 0.1 ± 0.0       |
| BASO (%)                   | 4.1 ± 0.4     | 4.1 ± 0.2        | 3.4 ± 0.6       |
| TP (g/dL)                  | 5.8 ± 0.1     | 6.1 ± 0.1        | 5.6 ± 0.1       |
| Alb (g/dL)                 | 0.9 ± 0.0     | 0.9 ± 0.1        | 1.0 ± 0.0       |
| ALP (IU/L)                 | 109 ± 9       | 127 ± 7          | 105 ± 12        |
| LAP (IU/L)                 | 69 ± 4        | 83 ± 2**         | 56 ± 3          |
| $\gamma$ -GT (IU/L)        | 9.8 ± 2.1     | 10.2 ± 2.2       | 7.0 ± 2.0       |
| LDH (IU/L)                 | 132 ± 22      | 110 ± 11         | 74 ± 6          |
| AST (IU/L)                 | 30 ± 7        | 22 ± 2           | 17 ± 3          |
| ALT (IU/L)                 | 32 ± 4        | 23 ± 2           | 26 ± 5          |
| Cre (mg/dL)                | 1.3 ± 0.0     | 1.3 ± 0.1        | 1.2 ± 0.0       |
| CK (IU/L)                  | 1568 ± 706    | 545 ± 60         | 390 ± 85        |
| Amylase (IU/L)             | 453 ± 21      | 451 ± 19         | 538 ± 75        |
| Glu (mg/dL)                | 99 ± 2        | 102 ± 2          | 89 ± 3*         |

WBC, white blood cells, RBC, red blood cells, HGB, hemoglobin, HCT, hematocrit, PLT, platelets, NEUT, neutrophils, LYMPH, lymphocytes, MONO, monocytes, EO, eosinophils, BASO, basophils, TP, total protein, Alb, albumin, ALP, alkaline phosphatase, LAP, leucine aminopeptidase,  $\gamma$ -GT,  $\gamma$ -glutamyl transferase, LDH, Lactate dehydrogenase, AST, aspartate aminotransferase, ALT, alanine aminotransferase, Cre, creatinine, Glu, glucose. The blood was collected from rabbits fed a cholesterol diet for 16 weeks. Rabbits were fasted for 16h before bleeding. Data are expressed as means ± SE. \*\*P<0.01, \*P<0.05 vs. non-Tg by ANOVA with Sheffe's F test.

## Supplemental Figures

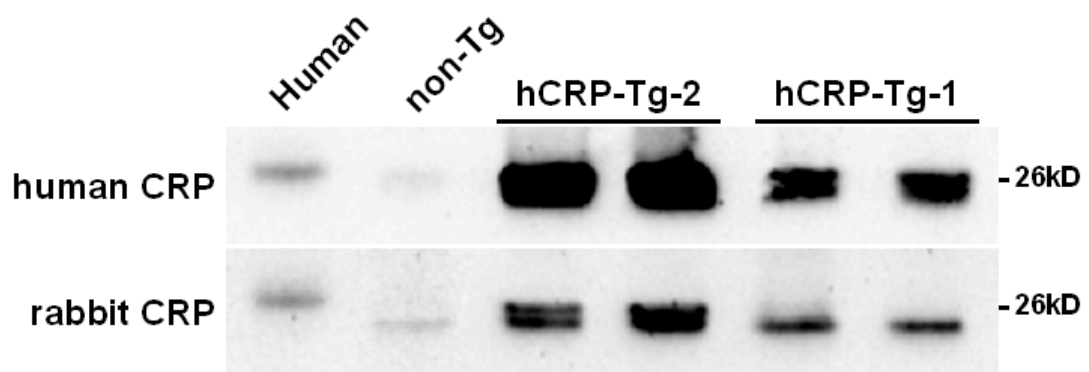

S-Fig.1

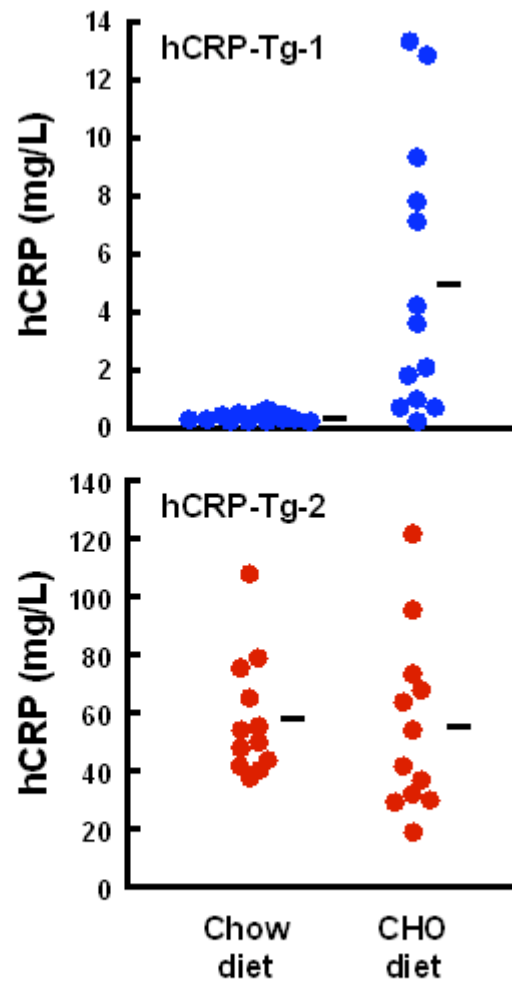

S-Fig.2

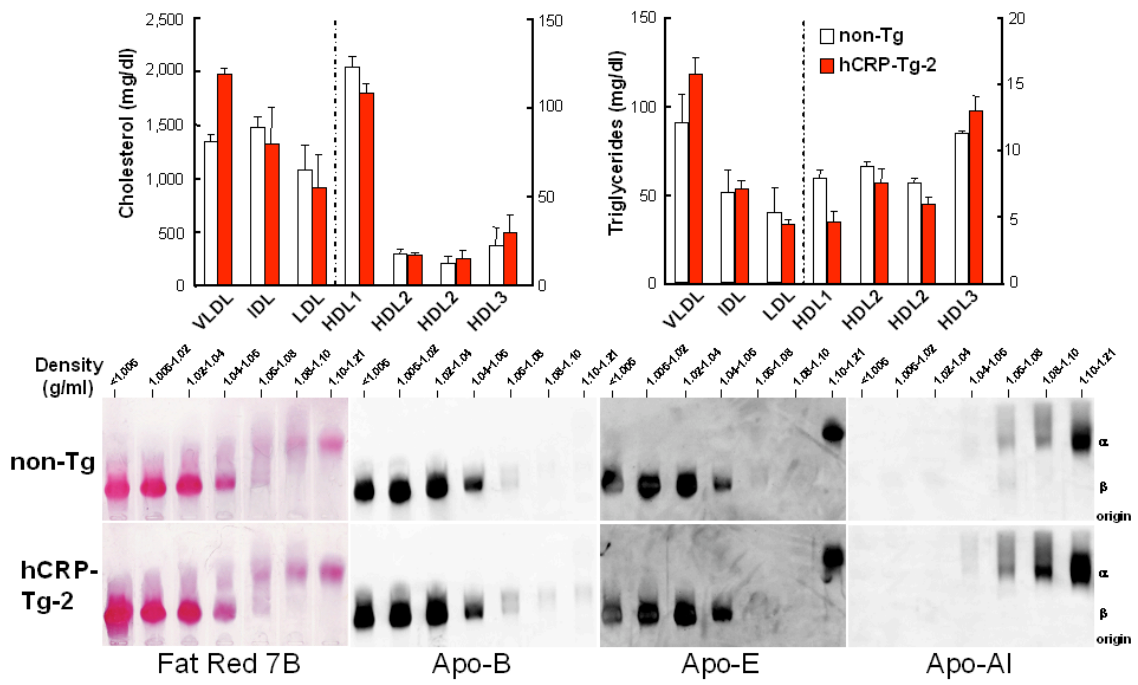

**S-Fig.3**

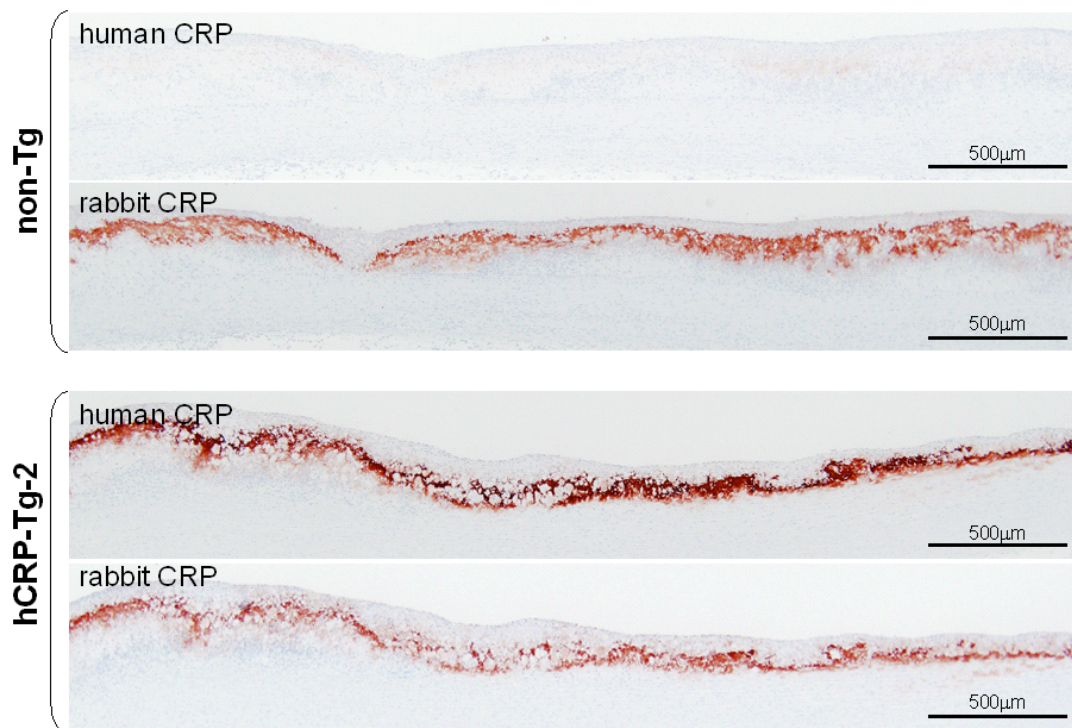

S-Fig.4

## Legends for Supplemental Figures

**S-Figure 1.** Comparison of antibodies against human and rabbit CRP by immunoblotting analysis

Plasma (1  $\mu$ l) obtained from a healthy volunteer human, non-Tg, hCRP-Tg-1 and Tg-2 rabbits were electrophoresed by 10% SDS-PAGE and immunoblotted with hCRP mAb and rCRP polyclonal Ab as described in Methods. Note that human CRP mAb cross-reacted slightly with rabbit plasma CRP whereas rabbit polyclonal Ab showed cross-reactivity with human plasma CRP.

**S-Figure 2.** Plasma levels of hCRP of two lines of Tg rabbits either fed a chow diet or cholesterol (CHO) diet for 16 weeks.

**S-Figure 3.** Lipoprotein profiles and apolipoprotein distribution of Tg and non-Tg rabbits at 16 weeks of cholesterol diet feeding. Density gradient fractions were isolated from fasting rabbit plasma by ultracentrifugation, and total cholesterol and triglyceride levels were measured as described previously<sup>1</sup> (top). The combined recovery of cholesterol from each animal averaged ~80% of the total plasma level. Data are expressed as mean  $\pm$  SE (n=4 for each group). Lipoproteins were resolved by electrophoresis in a 1% agarose gel and visualized with Fat Red 7B staining, and apolipoproteins were detected by immunoblotting with specific Abs against apo-B, apo-E, and apo-AI (bottom).

**S-Figure 4.** Detection of CRP immunoreactive proteins in the aortic lesions. Micrographs taken at lower magnification x4 show the both human and rabbit CRP immunoreactive proteins by immunohistochemical staining. Human CRP mAb showed slight cross-reactivity with rabbit endogenous CRP.

## Supplemental Reference

1. Fan J, Ji ZS, Huang Y, de Silva H, Sanan D, Mahley RW, Innerarity TL, Taylor JM. Increased expression of apolipoprotein E in transgenic rabbits results in reduced levels of very low density lipoproteins and an accumulation of low density lipoproteins in plasma. *J Clin Invest.* 1998;101:2151-2164.
